# Supplementary material for: EGF+61 A>G polymorphism does not predict response to first‐generation EGFR tyrosine kinase inhibitors in lung cancer patients
Source: PubMed Central journal article supplement (PMC7529554; doi:10.1111/1759-7714.13628), 2020-09-03

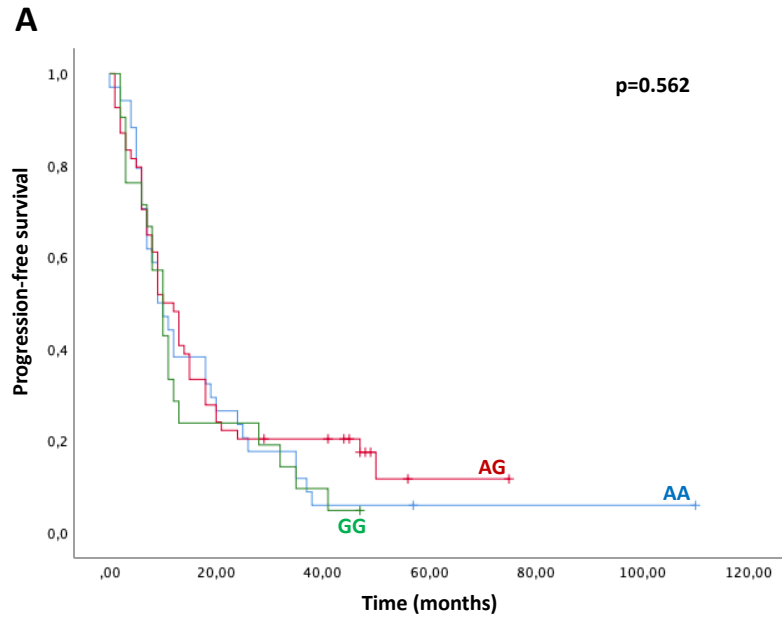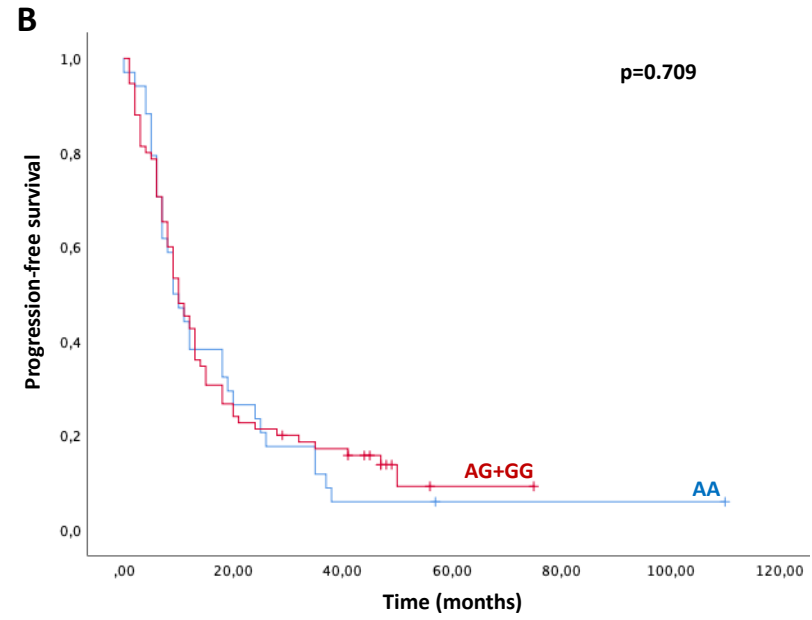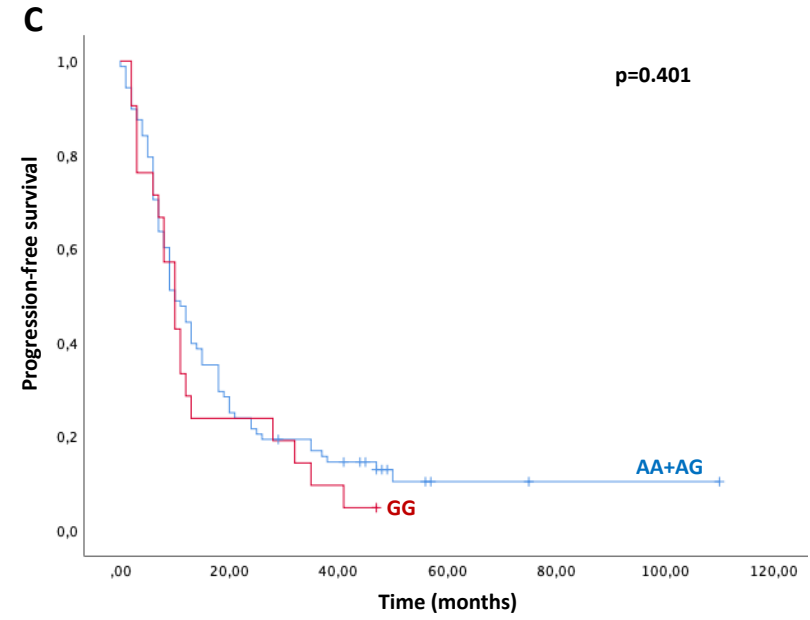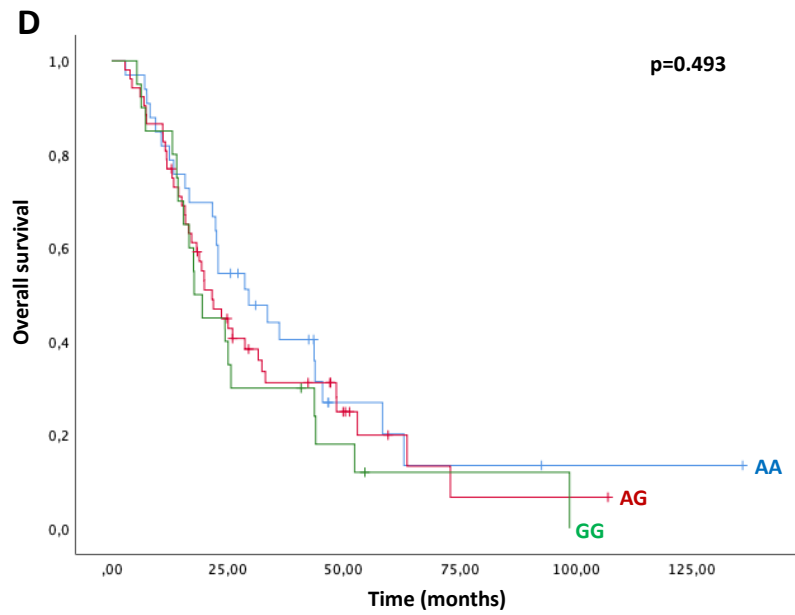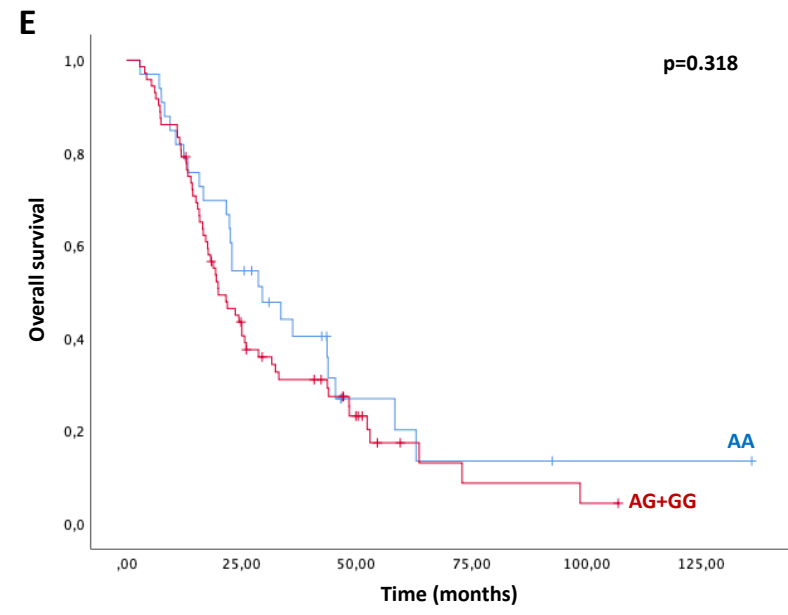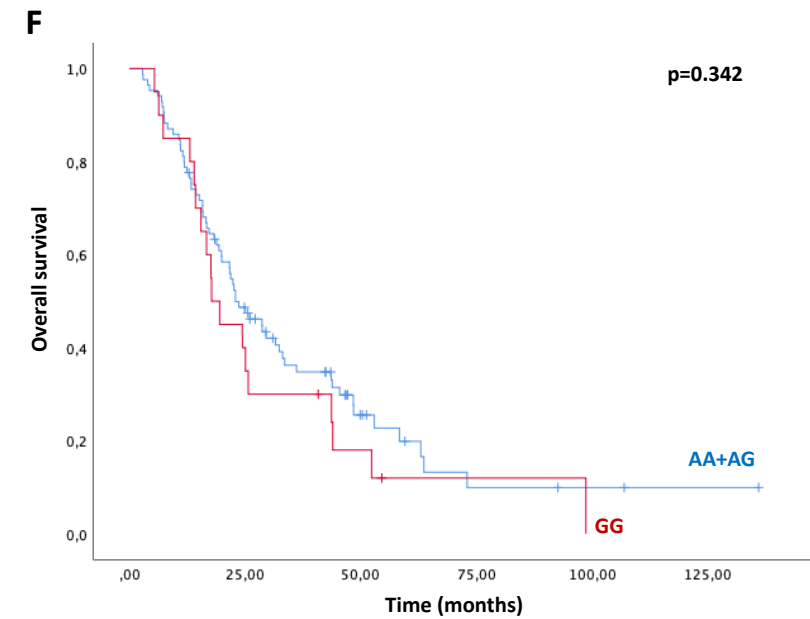

Supplement: TCA-11-2987-s001.pdf [file TCA-11-2987-s001.pdf]
