# Supplementary material for: EGF+61 A>G polymorphism does not predict response to first‐generation EGFR tyrosine kinase inhibitors in lung cancer patients
Source: PubMed Central journal article supplement (PMC7529554; doi:10.1111/1759-7714.13628), 2020-09-03
Supplement: TCA-11-2987-s002.pdf [file TCA-11-2987-s002.pdf]

**Supplementary Table 1:** Demographic and clinical-pathological features of TKI-treated NSCLC patients harboring *EGFR*-sensitizing mutations (n=111) and association with treatment response.

| Characteristics                   | PR |       | SD |       | DP |       | p value |
|-----------------------------------|----|-------|----|-------|----|-------|---------|
| Age                               |    |       |    |       |    |       |         |
| ≤63 years                         | 45 | 57.7% | 8  | 44.4% | 5  | 33.3% | 0.177   |
| >63 years                         | 33 | 42.3% | 10 | 55.6% | 10 | 66.7% |         |
| Sex                               |    |       |    |       |    |       |         |
| Male                              | 32 | 41.0% | 9  | 50.0% | 6  | 40.0% | 0.830   |
| Female                            | 46 | 59.0% | 9  | 50.0% | 9  | 60.0% |         |
| Smoking status                    |    |       |    |       |    |       |         |
| Never                             | 45 | 58.4% | 11 | 61.1% | 9  | 60.0% | 0.969   |
| Current                           | 12 | 15.6% | 2  | 11.1% | 3  | 20.0% |         |
| Former                            | 20 | 26.0% | 5  | 27.8% | 3  | 20.0% |         |
| TNM stage                         |    |       |    |       |    |       |         |
| I/II/III                          | 6  | 7.7%  | 4  | 22.2% | 2  | 13.3% | 0.138   |
| IV                                | 72 | 92.3% | 14 | 77.8% | 13 | 86.7% |         |
| ECOG PS                           |    |       |    |       |    |       |         |
| 0-1                               | 51 | 69.9% | 15 | 83.3% | 12 | 80.0% | 0.153   |
| 2                                 | 18 | 24.7% | 1  | 5.6%  | 1  | 6.7%  |         |
| 3-4                               | 4  | 5.5%  | 2  | 11.1% | 2  | 13.3% |         |
| Weight loss in 6 months           |    |       |    |       |    |       |         |
| >10%                              | 11 | 15.5% | 4  | 22.2% | 3  | 21.4% | 0.863   |
| <10%                              | 31 | 43.7% | 9  | 50.0% | 6  | 42.9% |         |
| None                              | 29 | 40.8% | 5  | 27.8% | 5  | 35.7% |         |
| Central nervous system metastasis |    |       |    |       |    |       |         |
| Yes                               | 23 | 29.5% | 6  | 33.3% | 3  | 20.0% | 0.681   |
| No                                | 55 | 70.5% | 12 | 66.7% | 12 | 80.0% |         |

PR, partial response; SD, stable disease; DP, disease progression. P values indicate results from univariate analysis by  $\chi^2$  test.

**Supplementary Table 2:** Genotypic and allelic frequencies of TKI-treated NSCLC patients harboring *EGFR*-sensitizing mutations (n=111).

| <b>Characteristics</b>      |       | <b>n = 111</b> | <b>Frequency*</b> |
|-----------------------------|-------|----------------|-------------------|
| Genotype (codominant model) | AA    | 35             | 31.5%             |
|                             | AG    | 55             | 49.6%             |
|                             | GG    | 21             | 18.9%             |
| Genotype (recessive model)  | AA    | 35             | 31.5%             |
|                             | AG+GG | 76             | 68.5%             |
| Genotype (dominant model)   | AA+AG | 90             | 81.1%             |
|                             | GG    | 21             |                   |
| Allele frequency            | A     |                | 56.3%             |
|                             | G     |                | 43.7%             |

*\*excluding invalid values*
